# Supplementary material for: Synthesis, characterization and properties of heat-resistant explosive materials: polynitroaromatic substituted difurazano[3,4-b:3′,4′-e]pyrazines
Source: Royal Society of Chemistry journal article supplement (doi:10.1039/c5ra07105d), 2015-01-01
Supplement: c5ra07105d1.pdf [file c5ra07105d1.pdf]

## Supporting Information

### **Synthesis, Characterization and Properties of Heat-resistant Explosive Materials: Polynitroaromatic Substituted Difurazano[3,4- *b*:3'4'-*e*]pyrazines**

Ning Liu,\* Yuan-Jie Shu, Hui Li, Lian-Jie Zhai, Ya-Nan Li and Bo-Zhou Wang

Xi'an Modern Chemistry Research Institute, Xi'an, Shanxi 710065, People's Republic of China

Email: flackliu@sina.com

#### **Table of Contents**

- 1. X-ray crystallography**
- 2. Theoretical study**
- 3. <sup>1</sup>H and <sup>13</sup>C NMR spectra**

## 1. X-ray crystallogray

Crystal of **2** was obtained from the solution in MeCN at -18°C. Bond lengths, bond angles and dihedral angles of the data collection and refinement are given in Table S1 and S2. The CIF file has been deposited at the Cambridge Crystallographic Data Centre as supplementary publication 955441.

Table S1. Bond lengths[Å] for the structure of **2**.

|             |            |             |            |
|-------------|------------|-------------|------------|
| N(1)-O(2)   | 1.210(2)   | C(1)-C(2)   | 1.382(2)   |
| N(1)-O(1)   | 1.2147(19) | C(1)-C(6)   | 1.387(2)   |
| N(1)-C(3)   | 1.4691(19) | C(1)-H(1)   | 0.9300     |
| N(2)-O(3)   | 1.2187(16) | C(2)-C(3)   | 1.379(2)   |
| N(2)-O(4)   | 1.2208(17) | C(2)-H(2A)  | 0.9300     |
| N(2)-C(5)   | 1.4732(18) | C(3)-C(4)   | 1.375(2)   |
| N(3)-C(7)   | 1.3881(18) | C(4)-C(5)   | 1.381(2)   |
| N(3)-C(8)   | 1.3910(18) | C(4)-H(4)   | 0.9300     |
| N(3)-C(6)   | 1.4285(18) | C(5)-C(6)   | 1.398(2)   |
| N(4)-C(7)#1 | 1.2955(19) | C(7)-N(4)#1 | 1.2956(19) |
| N(4)-O(5)   | 1.4040(16) | C(7)-C(8)#1 | 1.4282(19) |
| N(5)-C(8)   | 1.2904(18) | C(8)-C(7)#1 | 1.4282(19) |
| N(5)-O(5)   | 1.3991(17) |             |            |

Table S2. Bond angles [deg] and dihedral angles [deg] for the structure of **2**.

|                  |            |                       |             |
|------------------|------------|-----------------------|-------------|
| O(2)-N(1)-O(1)   | 123.98(15) | C(8)-N(5)-O(5)-N(4)   | 0.07(16)    |
| O(2)-N(1)-C(3)   | 117.89(14) | C(7)#1-N(4)-O(5)-N(5) | 0.30(16)    |
| O(1)-N(1)-C(3)   | 118.11(15) | C(6)-C(1)-C(2)-C(3)   | -1.5(2)     |
| O(3)-N(2)-O(4)   | 124.10(14) | C(1)-C(2)-C(3)-C(4)   | 1.7(2)      |
| O(3)-N(2)-C(5)   | 118.22(12) | C(1)-C(2)-C(3)-N(1)   | -179.79(14) |
| O(4)-N(2)-C(5)   | 117.52(13) | O(2)-N(1)-C(3)-C(4)   | -14.7(2)    |
| C(7)-N(3)-C(8)   | 113.74(11) | O(1)-N(1)-C(3)-C(4)   | 166.46(15)  |
| C(7)-N(3)-C(6)   | 122.84(11) | O(2)-N(1)-C(3)-C(2)   | 166.77(18)  |
| C(8)-N(3)-C(6)   | 122.55(11) | O(1)-N(1)-C(3)-C(2)   | -12.1(2)    |
| C(7)#1-N(4)-O(5) | 104.40(11) | C(2)-C(3)-C(4)-C(5)   | 0.5(2)      |
| C(8)-N(5)-O(5)   | 104.62(11) | N(1)-C(3)-C(4)-C(5)   | -177.99(13) |
| N(5)-O(5)-N(4)   | 111.06(10) | C(3)-C(4)-C(5)-C(6)   | -3.0(2)     |
| C(2)-C(1)-C(6)   | 121.05(14) | C(3)-C(4)-C(5)-N(2)   | 172.17(12)  |
| C(2)-C(1)-H(1)   | 119.5      | O(3)-N(2)-C(5)-C(4)   | 28.78(19)   |
| C(6)-C(1)-H(1)   | 119.5      | O(4)-N(2)-C(5)-C(4)   | -146.74(14) |
| C(3)-C(2)-C(1)   | 118.39(14) | O(3)-N(2)-C(5)-C(6)   | -156.12(14) |
| C(3)-C(2)-H(2A)  | 120.8      | O(4)-N(2)-C(5)-C(6)   | 28.4(2)     |
| C(1)-C(2)-H(2A)  | 120.8      | C(2)-C(1)-C(6)-C(5)   | -0.8(2)     |
| C(4)-C(3)-C(2)   | 122.70(13) | C(2)-C(1)-C(6)-N(3)   | 176.70(13)  |
| C(4)-C(3)-N(1)   | 117.87(14) | C(4)-C(5)-C(6)-C(1)   | 3.1(2)      |
| C(2)-C(3)-N(1)   | 119.42(14) | N(2)-C(5)-C(6)-C(1)   | -171.71(13) |
| C(3)-C(4)-C(5)   | 117.91(13) | C(4)-C(5)-C(6)-N(3)   | -174.27(12) |
| C(3)-C(4)-H(4)   | 121        | N(2)-C(5)-C(6)-N(3)   | 10.9(2)     |
| C(5)-C(4)-H(4)   | 121        | C(7)-N(3)-C(6)-C(1)   | 47.69(19)   |
| C(4)-C(5)-C(6)   | 121.35(13) | C(8)-N(3)-C(6)-C(1)   | -121.01(15) |
| C(4)-C(5)-N(2)   | 116.06(12) | C(7)-N(3)-C(6)-C(5)   | -134.92(14) |
| C(6)-C(5)-N(2)   | 122.40(12) | C(8)-N(3)-C(6)-C(5)   | 56.38(19)   |
| C(1)-C(6)-C(5)   | 118.50(13) | C(8)-N(3)-C(7)-N(4)#1 | -177.97(14) |
| C(1)-C(6)-N(3)   | 118.91(13) | C(6)-N(3)-C(7)-N(4)#1 | 12.4(2)     |
| C(5)-C(6)-N(3)   | 122.54(12) | C(8)-N(3)-C(7)-C(8)#1 | 0.7(2)      |
| N(4)#1-C(7)-N(3) | 127.03(13) | C(6)-N(3)-C(7)-C(8)#1 | -168.87(13) |

|                    |            |                       |             |
|--------------------|------------|-----------------------|-------------|
| N(4)#1-C(7)-C(8)#1 | 109.84(12) | O(5)-N(5)-C(8)-N(3)   | 178.27(13)  |
| N(3)-C(7)-C(8)#1   | 123.11(12) | O(5)-N(5)-C(8)-C(7)#1 | -0.39(16)   |
| N(5)-C(8)-N(3)     | 126.77(13) | C(7)-N(3)-C(8)-N(5)   | -179.22(14) |
| N(5)-C(8)-C(7)#1   | 110.08(12) | C(6)-N(3)-C(8)-N(5)   | -9.6(2)     |
| N(3)-C(8)-C(7)#1   | 123.14(12) | C(7)-N(3)-C(8)-C(7)#1 | -0.7(2)     |
|                    |            | C(6)-N(3)-C(8)-C(7)#1 | 168.91(13)  |

Symmetry transformations used to generate equivalent atoms: #1 -x+1,-y,-z

## 2. Theoretical study

Calculations were carried out by using the Gaussian 09 (Revision B. 01) suite of programs.<sup>1</sup> The geometric optimization of the structures and frequency analyses were carried out by using the B3LYP functional with the 6-31+G\*\*basis set, and single-point energies were calculated at the MP2(full)/6-311++G\*\* level. All of the optimized structures were characterized to be true local energy minima on the potential-energy surface without imaginary frequencies. Isodesmic reactions of all compounds are given in Scheme S1.

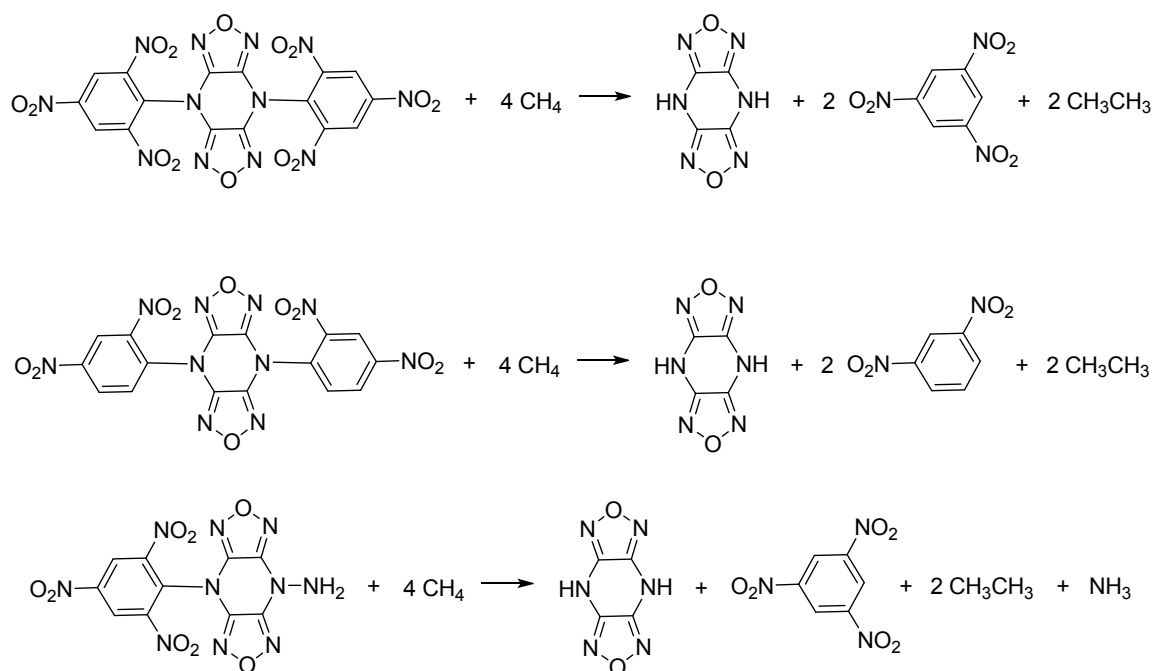

Scheme S1

### Geometry coordinates

The optimized structure of **1**

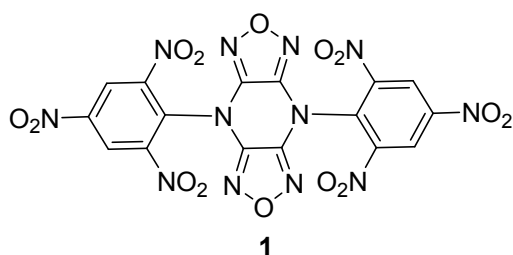

Table S3. Geometry coordinates of **1**.

|   |           |           |           |
|---|-----------|-----------|-----------|
| N | 7.170174  | 0.00043   | 0.000292  |
| N | 2.965435  | 2.467514  | 0.547355  |
| N | 1.473518  | -0.000322 | -0.000329 |
| N | -1.145723 | 1.448956  | -1.902593 |
| N | 1.145536  | 1.448535  | -1.903024 |
| O | 7.728982  | -1.078172 | -0.176899 |
| O | 7.728664  | 1.079154  | 0.17775   |
| O | 3.531905  | 3.484572  | 0.165188  |
| O | 1.930663  | 2.423073  | 1.206016  |
| O | -0.000123 | 1.92177   | -2.521741 |
| C | 3.627549  | -1.178801 | -0.219714 |
| C | 5.017193  | -1.199682 | -0.190413 |
| H | 5.557515  | -2.126532 | -0.336981 |
| C | 5.688917  | 0.000244  | 0.000109  |
| C | 5.016842  | 1.200002  | 0.190482  |
| H | 5.556905  | 2.12698   | 0.337189  |
| C | 3.6272    | 1.178761  | 0.219476  |
| C | 2.889108  | -0.000116 | -0.000204 |
| C | 0.716475  | -0.714342 | 0.920185  |
| C | 0.716393  | 0.713983  | -0.920547 |
| N | -7.170176 | -0.000152 | 0.000025  |
| N | -2.965707 | -2.467574 | -0.547539 |
| N | -1.47352  | 0.000195  | 0.000209  |
| N | 1.145718  | -1.449058 | 1.902494  |
| N | -1.14554  | -1.448639 | 1.902922  |
| O | -7.728881 | 1.078479  | 0.177361  |
| O | -7.728768 | -1.078834 | -0.177366 |
| O | -3.53216  | -3.48458  | -0.165211 |
| O | -1.931093 | -2.423244 | -1.206453 |
| O | 0.000119  | -1.921859 | 2.521652  |
| C | -3.627439 | 1.178786  | 0.219718  |
| C | -5.017082 | 1.199783  | 0.190562  |
| H | -5.557315 | 2.126674  | 0.337202  |
| C | -5.688918 | -0.000084 | 0.00007   |
| C | -5.016957 | -1.199888 | -0.190413 |

|   |           |           |           |
|---|-----------|-----------|-----------|
| H | -5.557109 | -2.126816 | -0.337106 |
| C | -3.627314 | -1.178763 | -0.219544 |
| C | -2.889111 | 0.000052  | 0.000125  |
| C | -0.716479 | 0.714227  | -0.920294 |
| C | -0.716396 | -0.714097 | 0.920439  |
| N | 2.966216  | -2.467762 | -0.5477   |
| O | 1.931641  | -2.423668 | -1.206671 |
| O | 3.532885  | -3.484634 | -0.16531  |
| N | -2.965934 | 2.467668  | 0.547644  |
| O | -1.931203 | 2.423423  | 1.206361  |
| O | -3.532617 | 3.484616  | 0.165471  |

The optimized structure of **2**

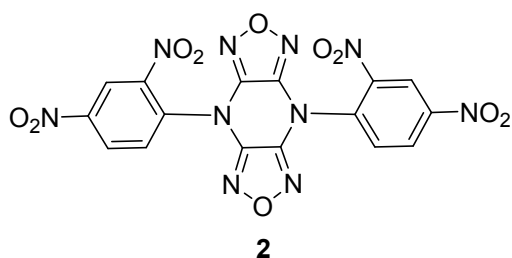

Table S4. Geometry coordinates of **2**.

|   |           |           |           |
|---|-----------|-----------|-----------|
| N | 7.12471   | 0.58755   | 0.224042  |
| N | 3.152223  | -2.041484 | -0.94033  |
| N | 1.460175  | 0.178799  | 0.107488  |
| N | -1.024468 | -1.964223 | 1.463896  |
| N | 1.246803  | -1.685714 | 1.62347   |
| O | 7.593836  | 1.648568  | 0.631215  |
| O | 7.779282  | -0.385672 | -0.142284 |
| O | 3.84087   | -3.052718 | -0.863835 |
| O | 2.059038  | -1.968505 | -1.502878 |
| O | 0.14924   | -2.418794 | 2.046472  |
| C | 3.48687   | 1.432066  | 0.544515  |
| H | 2.85657   | 2.245664  | 0.884649  |
| C | 4.872657  | 1.557159  | 0.578745  |
| H | 5.348729  | 2.463919  | 0.930766  |
| C | 5.650883  | 0.475959  | 0.172029  |
| C | 5.08903   | -0.709872 | -0.284146 |
| H | 5.710989  | -1.536935 | -0.601183 |
| C | 3.702459  | -0.802797 | -0.347606 |
| C | 2.882583  | 0.256909  | 0.086849  |
| C | 0.656844  | 0.981694  | -0.694531 |

|   |           |           |           |
|---|-----------|-----------|-----------|
| C | 0.764179  | -0.809487 | 0.792789  |
| N | -7.124881 | -0.58702  | -0.223535 |
| N | -3.151724 | 2.041114  | 0.940674  |
| N | -1.460248 | -0.179115 | -0.108134 |
| N | 1.024345  | 1.964094  | -1.464329 |
| N | -1.246927 | 1.685569  | -1.623901 |
| O | -7.594228 | -1.647854 | -0.630898 |
| O | -7.779224 | 0.38614   | 0.143309  |
| O | -3.840348 | 3.052413  | 0.864831  |
| O | -2.058352 | 1.967847  | 1.502825  |
| O | -0.149375 | 2.418707  | -2.046843 |
| C | -3.487227 | -1.431924 | -0.545163 |
| H | -2.857104 | -2.245485 | -0.885718 |
| C | -4.87304  | -1.556812 | -0.579107 |
| H | -5.349324 | -2.463389 | -0.931316 |
| C | -5.651026 | -0.475644 | -0.171839 |
| C | -5.088893 | 0.709954  | 0.284607  |
| H | -5.710662 | 1.537003  | 0.602052  |
| C | -3.702296 | 0.802666  | 0.347761  |
| C | -2.882678 | -0.257013 | -0.087229 |
| C | -0.656936 | -0.981916 | 0.693996  |
| C | -0.764273 | 0.809253  | -0.79333  |

The optimized structure of **3**

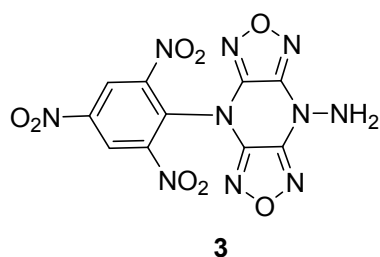

Table S5. Geometry coordinates of **3**.

|   |           |           |           |
|---|-----------|-----------|-----------|
| N | 4.930311  | -0.010326 | 0.002542  |
| N | 0.731852  | 2.255528  | 1.137283  |
| N | -0.76368  | 0.002199  | 0.0003    |
| N | -3.36164  | 1.921459  | -1.483581 |
| N | -1.063129 | 1.895646  | -1.461036 |
| O | 5.487946  | -1.01556  | -0.429313 |
| O | 5.491616  | 0.992957  | 0.434088  |
| O | 1.297857  | 3.335206  | 1.015602  |
| O | -0.29992  | 2.052208  | 1.771592  |

|   |           |           |           |
|---|-----------|-----------|-----------|
| O | -2.196382 | 2.525051  | -1.946421 |
| C | 1.386238  | -1.094891 | -0.494707 |
| C | 2.775742  | -1.124768 | -0.471803 |
| H | 3.314765  | -1.988848 | -0.839105 |
| C | 3.450134  | -0.007696 | 0.00284   |
| C | 2.779738  | 1.111561  | 0.47832   |
| H | 3.321759  | 1.973609  | 0.846079  |
| C | 1.39034   | 1.086408  | 0.5012    |
| C | 0.648492  | -0.002464 | 0.002558  |
| C | -1.523381 | -0.923006 | 0.705816  |
| C | -1.514001 | 0.935669  | -0.712395 |
| N | -1.102671 | -1.890333 | 1.463186  |
| N | -3.401091 | -1.875407 | 1.447923  |
| O | -2.255317 | -2.501589 | 1.933237  |
| C | -2.951028 | 0.946063  | -0.724709 |
| C | -2.958561 | -0.908998 | 0.695296  |
| N | -5.094384 | 0.048849  | -0.039993 |
| H | -5.445832 | -0.831591 | -0.411241 |
| H | -5.445436 | 0.180501  | 0.906602  |
| N | -3.696722 | 0.017406  | -0.016679 |
| N | 0.723983  | -2.264211 | -1.126701 |
| O | 1.290246  | -3.344187 | -1.006622 |
| O | -0.311961 | -2.062413 | -1.754606 |

Table S6. Ab Initio computational data.

| Compound                                                                            | $E_0$ (hartree) | $H_T$ (hartree) | ZPE (hartree) | HOF <sup>Exp</sup> (kJ/mol) | HOF <sup>Calcd</sup> (kJ/mol) |
|-------------------------------------------------------------------------------------|-----------------|-----------------|---------------|-----------------------------|-------------------------------|
| <b>1</b>                                                                            | -2321.235360    | 0.031485        | 0.188976      | —                           | 894.1                         |
| <b>2</b>                                                                            | -1912.288151    | 0.028812        | 0.187609      | —                           | 782.6                         |
| <b>3</b>                                                                            | -1532.104412    | 0.023060        | 0.185683      | —                           | 845.6                         |
| CH <sub>4</sub>                                                                     | -40.481351      | 0.003812        | 0.044793      | -74.6 <sup>2</sup>          | —                             |
| CH <sub>3</sub> CH <sub>3</sub>                                                     | -79.767042      | 0.004428        | 0.074599      | -84 <sup>2</sup>            | —                             |
| 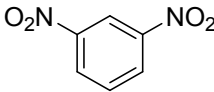 | -641.175553     | 0.010328        | 0.105242      | -27 <sup>2</sup>            | —                             |
|  | -845.671111     | 0.013008        | 0.107081      | -37.7 <sup>2</sup>          | —                             |
|  | -632.345929     | 0.009156        | 0.084082      | 674.1 <sup>3</sup>          | —                             |
| NH <sub>3</sub>                                                                     | -56.532613      | 0.003818        | 0.034372      | -45.9 <sup>2</sup>          | —                             |

## References:

- 1 M. J. Frisch, G. W. Trucks, H. B. Schlegel, G. E. Scuseria, M. A. Robb, J. R. Cheeseman, G. Scalmani, V. Barone, B. Mennucci, G. A. Petersson, H. Nakatsuji, M. Caricato, X. Li, H. P. Hratchian, A. F. Izmaylov, J. Bloino, G. Zheng, J. L. Sonnenberg, M. Hada, M. Ehara, K. Toyota, R. Fukuda, J. Hasegawa, M. Ishida, T. Nakajima, Y. Honda, O. Kitao, H. Nakai, T. Vreven, J. A. Montgomery, Jr., J. E. Peralta, F. Ogliaro, M. Bearpark, J. J. Heyd, E. Brothers, K. N. Kudin, V. N. Staroverov, R. Kobayashi, J. Normand, K. Raghavachari, A. Rendell, J. C. Burant, S. S. Iyengar, J. Tomasi, M. Cossi, N. Rega, J. M. Millam, M. Klene, J. E. Knox, J. B. Cross, V. Bakken, C. Adamo, J. Jaramillo, R. Gomperts, R. E. Stratmann, O. Yazyev, A. J. Austin, R. Cammi, C. Pomelli, J. W. Ochterski, R. L. Martin, K. Morokuma, V. G. Zakrzewski, G. A. Voth, P. Salvador, J. J. Dannenberg, S. Dapprich, A. D. Daniels, O. Farkas, J. B. Foresman, J. V. Ortiz, J. Cioslowski, D. J. Fox, *Gaussian 09, Revision B. 01*, Gaussian, Inc., Wallingford, CT, USA, 2009.
- 2 NIST Chemistry WebBook.
- 3 I. V. Tselinskii, S. F. Mel'nikova, T. V. Romanova, S. V. Pirogov, G. Kh. Khisamutdinov, T. A. Mratkuzina, V. L. Korolev, I. Z. Kondyukov, I. Sh. Abdrakhmanov, S. P. Smirnov, *Russ. J. Org. Chem.*, 1997, **33**, 1656.

### 3. $^1\text{H}$ and $^{13}\text{C}$ NMR spectra of compounds 1-3



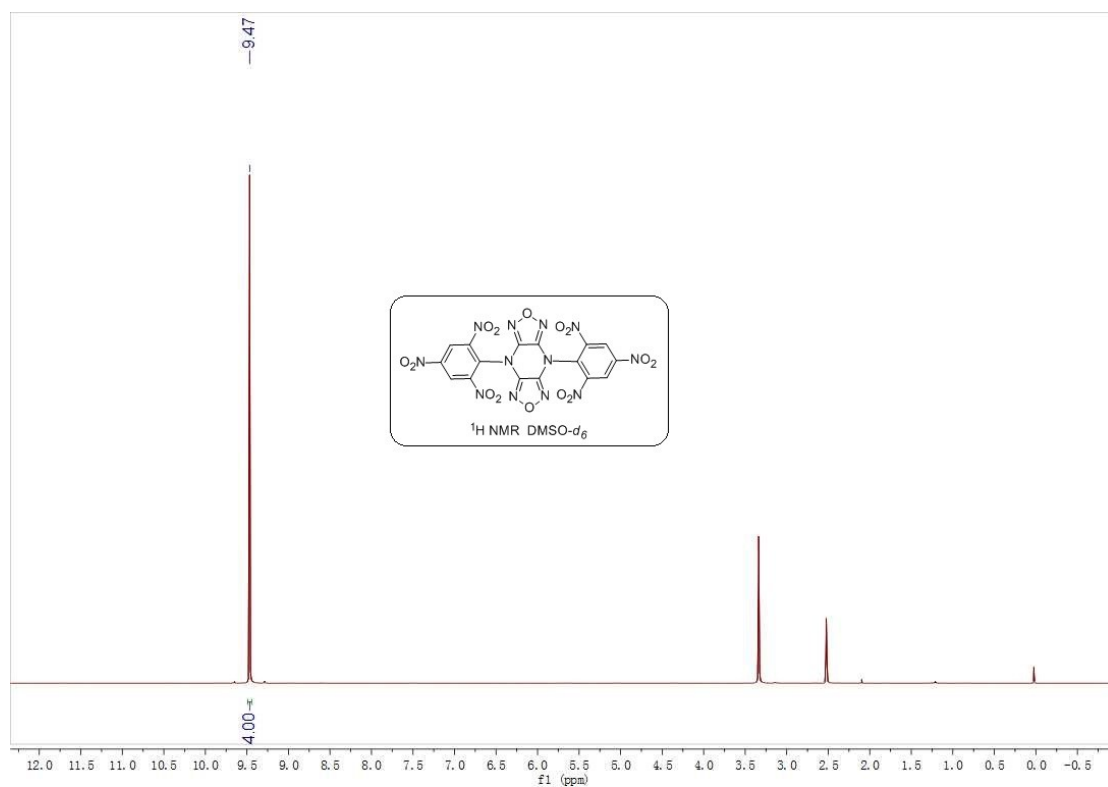

**Fig. S1**  $^1\text{H}$  NMR spectrum of **1** in  $\text{DMSO-}d_6$

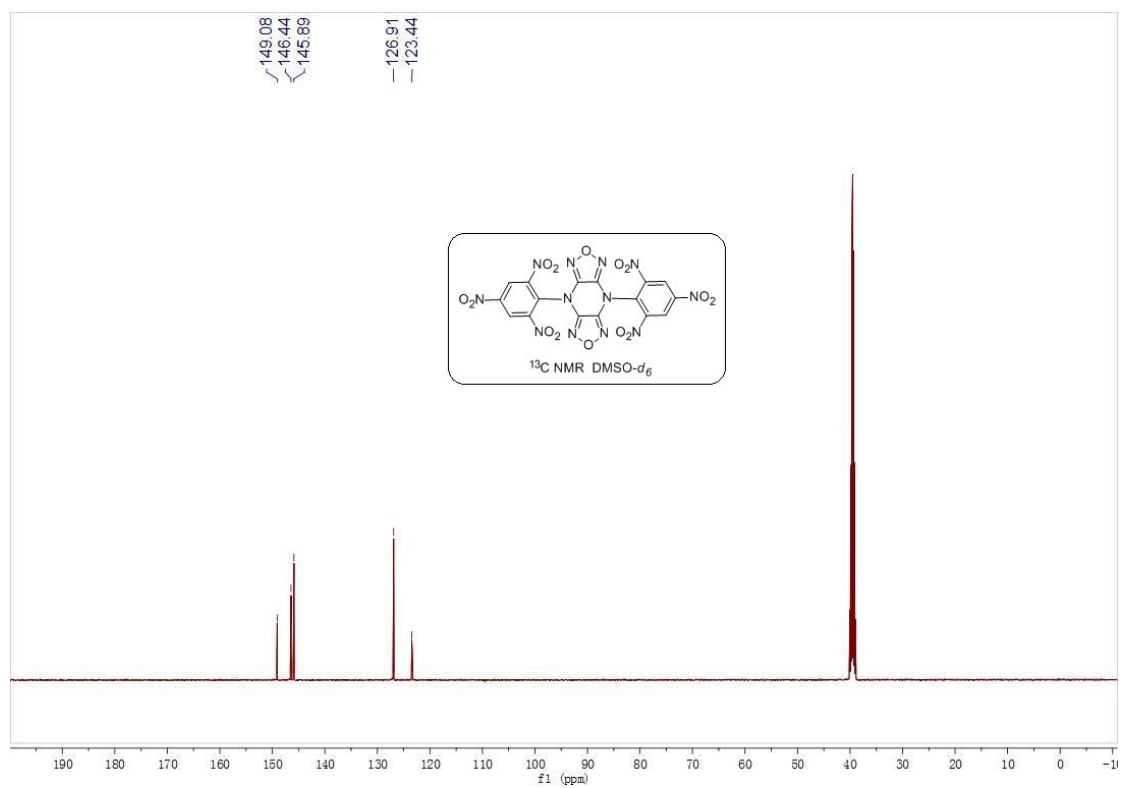

**Fig. S2**  $^{13}\text{C}$  NMR spectrum of **1** in  $\text{DMSO-}d_6$

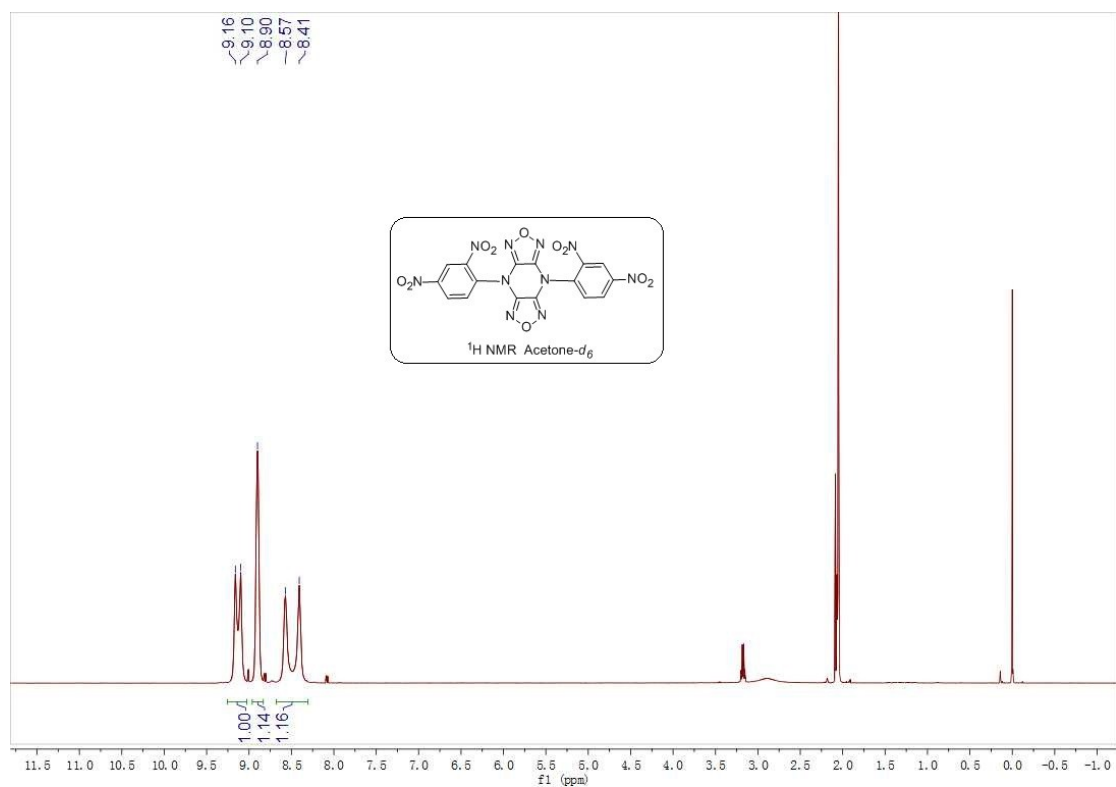

Fig. S3 <sup>1</sup>H NMR spectrum of **2** in Acetone-*d*<sub>6</sub>

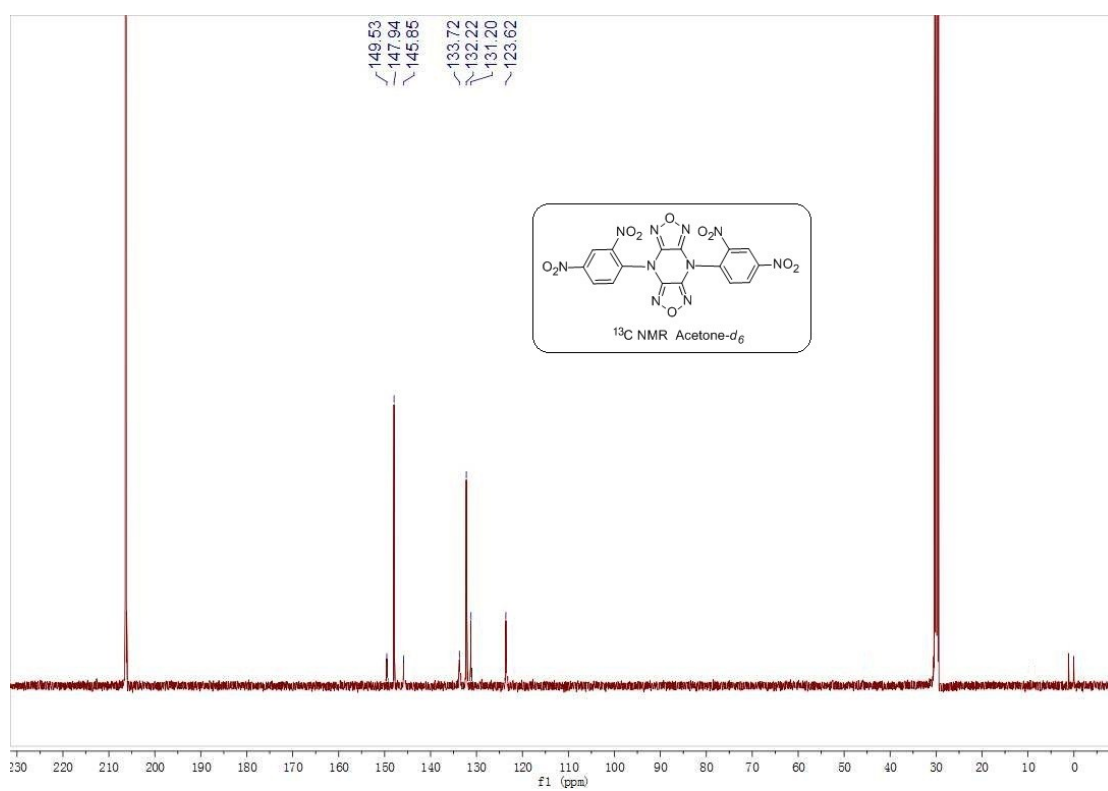

Fig. S4 <sup>13</sup>C NMR spectrum of **2** in Acetone-*d*<sub>6</sub>

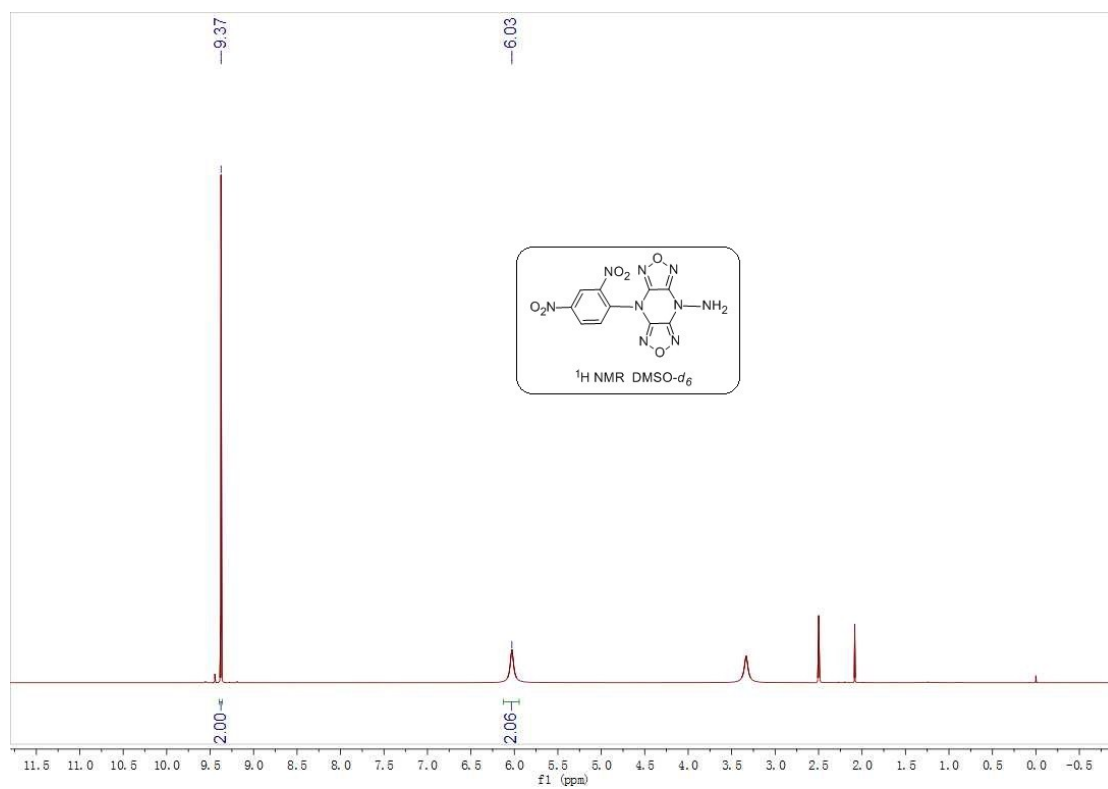

**Fig. S5**  $^1\text{H NMR}$  spectrum of **3** in  $\text{DMSO-}d_6$

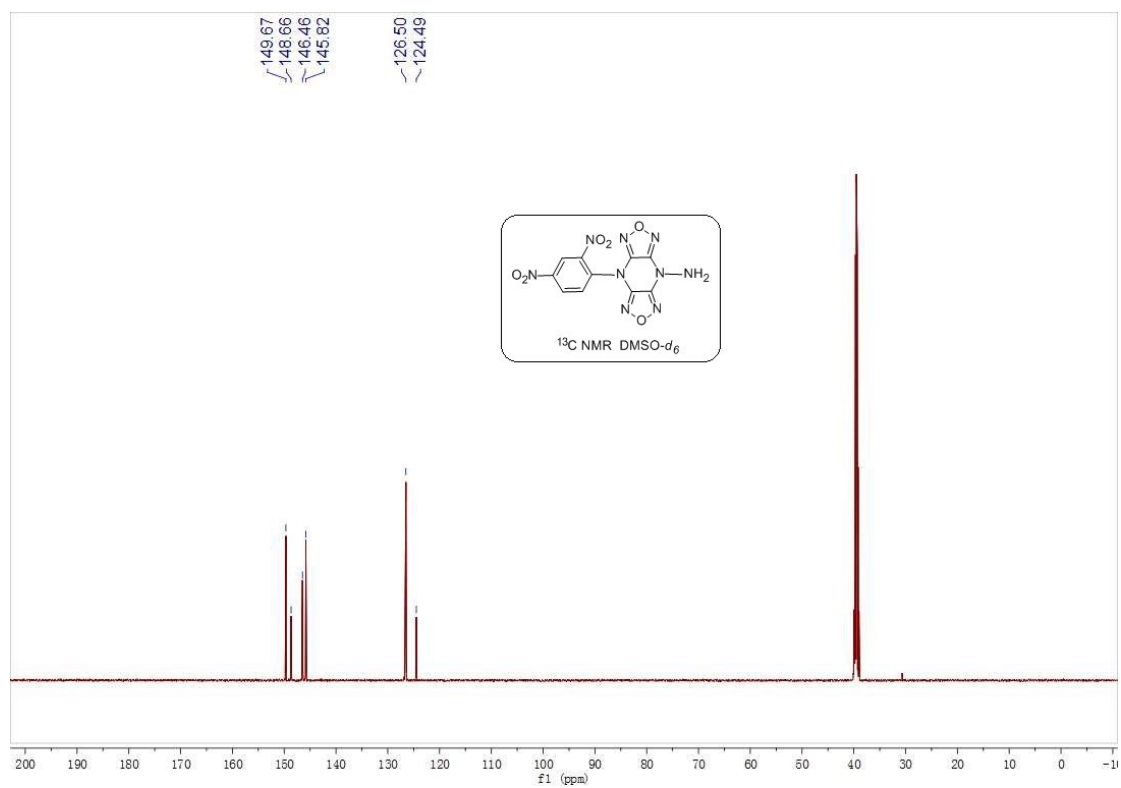

**Fig. S6**  $^{13}\text{C NMR}$  spectrum of **3** in  $\text{DMSO-}d_6$
